# Supplementary material
Source: publisher site journal article supplement (https://www.dovepress.com/article/183583)
Supplement: Supplementary file 1 [file get_supplementary_file.php]

## Supplement 1. Risk scores and cut-points for distinguishing low from high risk

### ***TIMI score***

| TIMI score                                                                                     | Yes 1 point | No 0 points |
|------------------------------------------------------------------------------------------------|-------------|-------------|
| Age $\geq 65$                                                                                  |             |             |
| $\geq 3$ risk factors for ACS; hypertension, hyperlipidemia, smoking, diabetes, family history |             |             |
| Use of aspirin in last 7 days                                                                  |             |             |
| Prior coronary stenosis $\geq 50\%$                                                            |             |             |
| $\geq 2$ angina events in 24 hours or persisting discomfort                                    |             |             |
| ST-segment deviation of $\geq 0.05$ mV on initial ECG                                          |             |             |
| Elevated cardiac biomarkers                                                                    |             |             |
| Total score                                                                                    |             |             |

Cut-point: Low risk = 0-2 points; High risk = 3-7 points

## **Modified TIMI score**

| Modified TIMI score                                                                            | Yes | No |
|------------------------------------------------------------------------------------------------|-----|----|
| Age $\geq 65$                                                                                  | 1   |    |
| $\geq 3$ risk factors for ACS; hypertension, hyperlipidemia, smoking, diabetes, family history | 1   |    |
| Use of aspirin in last 7 days                                                                  | 1   |    |
| Prior coronary stenosis $\geq 50\%$                                                            | 1   |    |
| $\geq 2$ angina events in 24 hours or persisting discomfort                                    | 1   |    |
| ST-segment deviation of $\geq 0.05$ mV on initial ECG                                          | 5*  |    |
| Elevated cardiac biomarkers                                                                    | 5*  |    |
| Total score                                                                                    |     |    |

Cut-points: Low risk = 0-2 points; High risk = 3-10 points

\* The presence of either or both variables attracts value of 5 points giving a total possible m TIMI score of 10.

## GRACE Score

| GRACE score |        |         |        |         |        |          |        |                                 |        |
|-------------|--------|---------|--------|---------|--------|----------|--------|---------------------------------|--------|
| Age         | Points | HR      | Points | SBP     | Points | Cr       | Points | Killip class                    | Points |
| <39         | 0      | <70     | 0      | <80     | 40     | 0.0–0.39 | 1      | I                               | 0      |
| 40–49       | 18     | 70–89   | 5      | 80–99   | 37     | 0.4–0.79 | 4      | II                              | 15     |
| 50–59       | 36     | 90–109  | 10     | 100–119 | 30     | 0.8–1.19 | 7      | III                             | 29     |
| 60–69       | 55     | 110–149 | 17     | 120–139 | 23     | 1.2–1.59 | 10     | IV                              | 44     |
| 70–79       | 73     | 150–199 | 26     | 140–159 | 17     | 1.6–1.99 | 13     | <b>Cardiac arrest</b>           | 30     |
| 80–89       | 91     | ≥200    | 34     | 160–199 | 7      | 2.0–3.99 | 21     | <b>Elevated cardiac markers</b> | 13     |
| >90         | 100    | –       | –      | ≥200    | 0      | ≥4       | 28     | <b>ST-segment deviation</b>     | 17     |

Cut-point: Low risk = 1-88 points; High risk = ≥ 89 points

## ***PURSUIT Score***

|                              |                    |       |
|------------------------------|--------------------|-------|
| Age (decade)                 | 50                 | 8     |
|                              | 60                 | 9     |
|                              | 70                 | 11    |
|                              | 80                 | 12    |
| Sex                          | Male               | 0     |
|                              | Female             | 1     |
| Worst CCS class past 6 weeks | No angina/CCS I/II | 0     |
|                              | CCS III/IV         | 2     |
| Signs of heart failure       |                    | 2     |
| ST depression on ECG         |                    | 2     |
|                              |                    | Total |

Cut-point: Low risk = < 10 points; High risk =  $\geq 10$  points

## **HEART Score**

|              |                                                        |       |
|--------------|--------------------------------------------------------|-------|
| History      | Highly suspicious                                      | 2     |
|              | Moderately suspicious                                  | 1     |
|              | Slightly suspicious                                    | 0     |
| ECG          | Significant ST - depression                            | 2     |
|              | Nonspecific repolarization disturbance                 | 1     |
|              | Normal                                                 | 0     |
| Age          | ≥ 65 year                                              | 2     |
|              | 45 – 65 year                                           | 1     |
|              | ≤ 45 year                                              | 0     |
| Risk Factors | ≥ 3 risk factors or history of atherosclerotic disease | 2     |
|              | 1 or 2 risk factors                                    | 1     |
|              | No risk factors                                        | 0     |
| Troponin     | ≥ 3x normal limit                                      |       |
|              | 1-3x normal limit                                      |       |
|              | ≤ normal limit                                         |       |
|              |                                                        | Total |

Cut-point: Low risk = 0–3 points; High-risk = ≥4 points

## EDACS

| Clinical Characteristic                                                                                                                                                                    | Score |
|--------------------------------------------------------------------------------------------------------------------------------------------------------------------------------------------|-------|
| Age                                                                                                                                                                                        |       |
| 18-45                                                                                                                                                                                      | +2    |
| 46-50                                                                                                                                                                                      | +4    |
| 51-55                                                                                                                                                                                      | +6    |
| 56-60                                                                                                                                                                                      | +8    |
| 61-65                                                                                                                                                                                      | +10   |
| 66-70                                                                                                                                                                                      | +12   |
| 71-75                                                                                                                                                                                      | +14   |
| 76-80                                                                                                                                                                                      | +16   |
| 81-85                                                                                                                                                                                      | +18   |
| 86+                                                                                                                                                                                        | +20   |
| Male Sex                                                                                                                                                                                   | +6    |
| Aged 18-50 years and either:<br><br>List-behavior=simple<br>prefix-word= mark-<br>type=none<br>(i) <input type="checkbox"/> known CAD or<br>(ii) <input type="checkbox"/> ≥ 3 risk factors | +4    |
| Symptoms and signs                                                                                                                                                                         |       |
| Diaphoresis                                                                                                                                                                                | +3    |
| Radiates to arm or shoulder                                                                                                                                                                | +5    |
| Pain occurred or worsened with<br>Inspiration                                                                                                                                              | -4    |
| Pain is reproduced by palpation                                                                                                                                                            | -6    |
| EDACS                                                                                                                                                                                      |       |

Cut-point: Low-risk = <16 points; High risk = ≥16 points

## **ADAPT**

| High-risk criteria                                       | Yes | No |
|----------------------------------------------------------|-----|----|
| 1) TIMI score >0                                         |     |    |
| a) Age ≥65                                               |     |    |
| b) ≥3 risk factors                                       |     |    |
| c) Use of aspirin in last 7 days                         |     |    |
| d) Significant coronary stenosis (prior stenosis ≥50%)   |     |    |
| e) ≥2 angina events in 24 hours or persisting discomfort |     |    |
| f) ST-segment deviation of ≥0.05 mV on initial ECG       |     |    |
| g) Increased initial troponin                            |     |    |
| 2) Positive troponin test at 0 or 2 hours                |     |    |
| 3) New ischemic ECG changes                              |     |    |

Cut-point: Low risk = none of the high-risk criteria.

**NACPR**

| High-risk criteria            | Yes | No |
|-------------------------------|-----|----|
| Age 50                        |     |    |
| Acute ischemic ECG changes    |     |    |
| Known coronary artery disease |     |    |
| Pain typical for ACS          |     |    |
| Any troponin >99th percentile |     |    |

Cut-point: Low risk = none of the high-risk criteria



### ***Florence Prediction Rule (FPR)***

|                                         |    |
|-----------------------------------------|----|
| CP score > 6                            | +3 |
| Age > 50 years                          | +1 |
| Male sex                                | +1 |
| Diabetes Mellitus or Metabolic syndrome | +1 |

Cut-point: Low risk = 0-1 points; High risk = 2-6 points

## **Supplement 2. Test diagnostic criteria for coronary heart disease†**

- Exercise stress electrocardiography: inducible horizontal or down sloping ST-segment depression  $\geq 1.0$  mm in two or more contiguous leads
- Stress echocardiography: inducible or fixed regional wall motion abnormalities
- Rest echocardiography: fixed regional wall motion abnormalities
- Stress myocardial perfusion imaging: fixed or inducible regional perfusion defects
- Computed tomography coronary angiography:  $>50\%$  narrowing in at least one epicardial coronary artery
- Invasive coronary angiography:  $\geq 75\%$  narrowing or occlusion in at least one epicardial coronary artery or  $\geq 50\%$  narrowing or occlusion in left main coronary artery

†Any test result reported as being 'equivocal' was classified in this study as being 'positive'
